# Supplementary material for: 3D Porous Scaffold-Based High-Throughput Platform for Cancer Drug Screening
Source: MDPI journal article supplement (doi:10.3390/pharmaceutics15061691), 2023-06-09
Supplement: s1 [file s1]

## Supporting Information

### 3D porous scaffold-based high-throughput platform for cancer drug screening

**Author name:** Yang Zhou, Gillian Pereira, Yuanzhang Tang, Matthew James, and Miqin Zhang

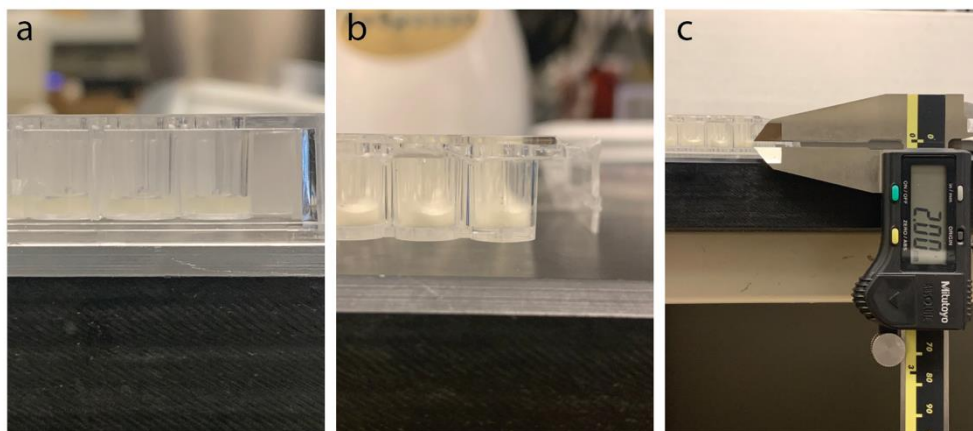

**Figure S1. Optical photos of polymer solutions and freeze-dried scaffolds in 96-well tissue culture plates.** (a) The picture of polymer solution dispensed in 96-well tissue culture plates. (b) The image of freeze-dried scaffolds in 96-well tissue culture plates. (c) The thickness measurement of the freeze-dried scaffolds using a caliper.

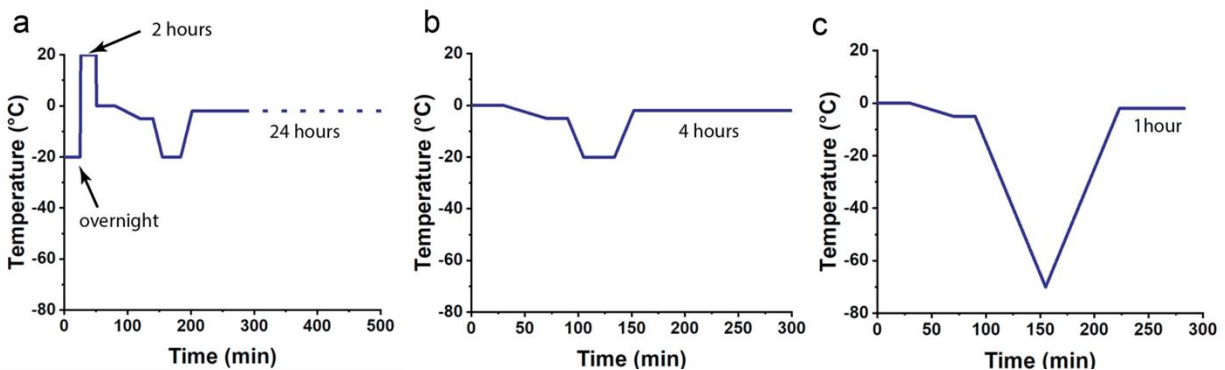

**Figure S2. Freezing profiles of scaffolds with different pore sizes.** (a) Freezing history of the scaffold with (a) large pore size, (b) with medium pore size and (c) smallest pore size.

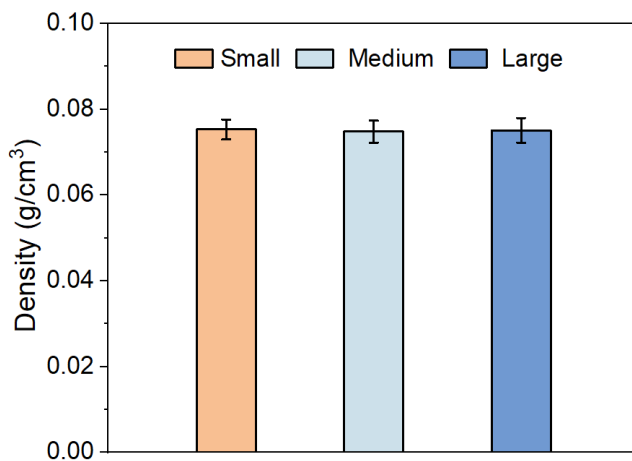

**Figure S3. Density measurements of scaffolds of different pore sizes (Small, Medium, and Large).** n = 5.

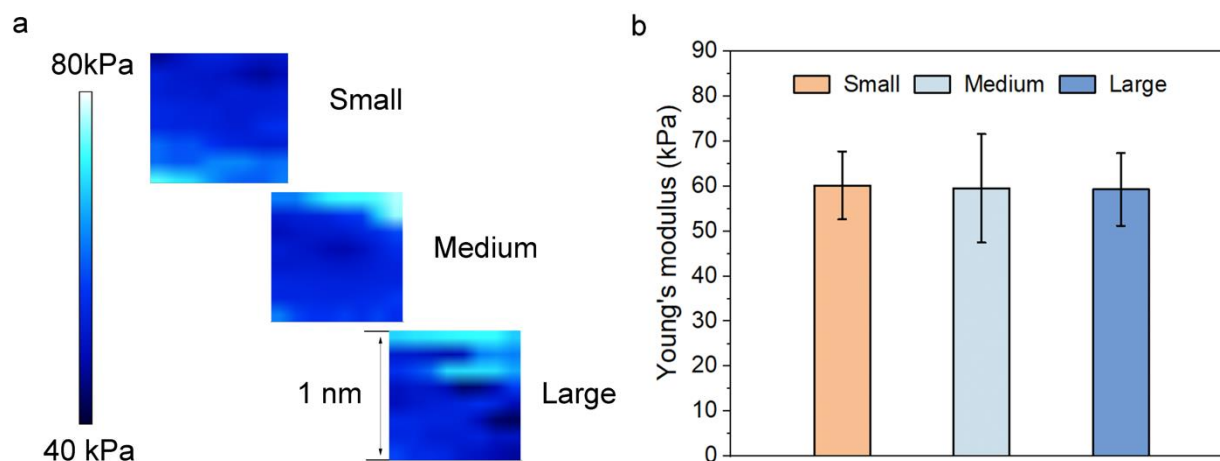

**Figure S4. Scaffold surface Young's modulus characterization by AFM.** (a) Surface Young's modulus mapping of  $1 \times 1$  nm area on scaffolds of different pore sizes. (b) Average surface Young's moduli of scaffolds of different pore sizes.  $n = 3$ .

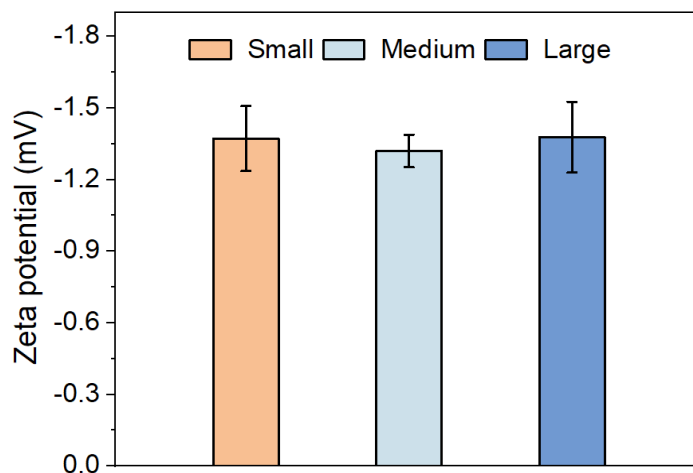

**Figure S5. Zeta potential of scaffolds of different pore sizes measured at pH = 7.4.**  $n = 3$ .
